# Supplementary material
Source: PubMed Central journal article supplement (PMC5491097)
Supplement: NIHMS868639-supplement-1.pdf [file NIHMS868639-supplement-1.pdf]

**Figure S1.** DP-implanted PCa cells demonstrate more extensive metastasis than SC-implanted PCa cells. The NOD/SCID mouse (#3793) was implanted with 100,000 PC3-Luc/GFP cells into the DP (**A**) and a separate mouse (#3750) was implanted with 100,000 PC3-Luc/GFP cells SC (**B**). Shown are representative phase and GFP images of the primary tumor for both mice (left) and of the lung, kidney/LN, pancreas, spleen, liver, brain and heart. Note that DP implanted PC3-Luc/GFP cells metastasized to many end organs whereas SC implanted cells did not metastasize in spite of very similar tumor sizes.

**Figure S2.** AP-implanted PC3 cells metastasize to many organs. (**A**) Shown are representative images of PC3-GFP cells cultured (~2 weeks after plating) from various end organs. The animal was implanted with 1,000,000 PC3-GFP cells SC and sacrificed one month after implantation. Note that PC3-GFP cells metastasized to the lung but not to other organs. The GFP<sup>-</sup> cells on the background are the host cells. (**B**) Images of PC3-GFP cells from end organs cultured for 2 or 10 days. The mouse (#0020) was implanted with 100,000 PC3-GFP cells in the AP. Note abundant PC3-GFP cells that had metastasized to the LN with fewer cells to the lung, kidney, and pancreas (left). However, the few cells that metastasized to these latter organs were live cells as they grew up to form colonies in 10 days (right). Original magnifications, x200.

**A** **PC3-Luc/GFP 100k; DP** (animal #3793)

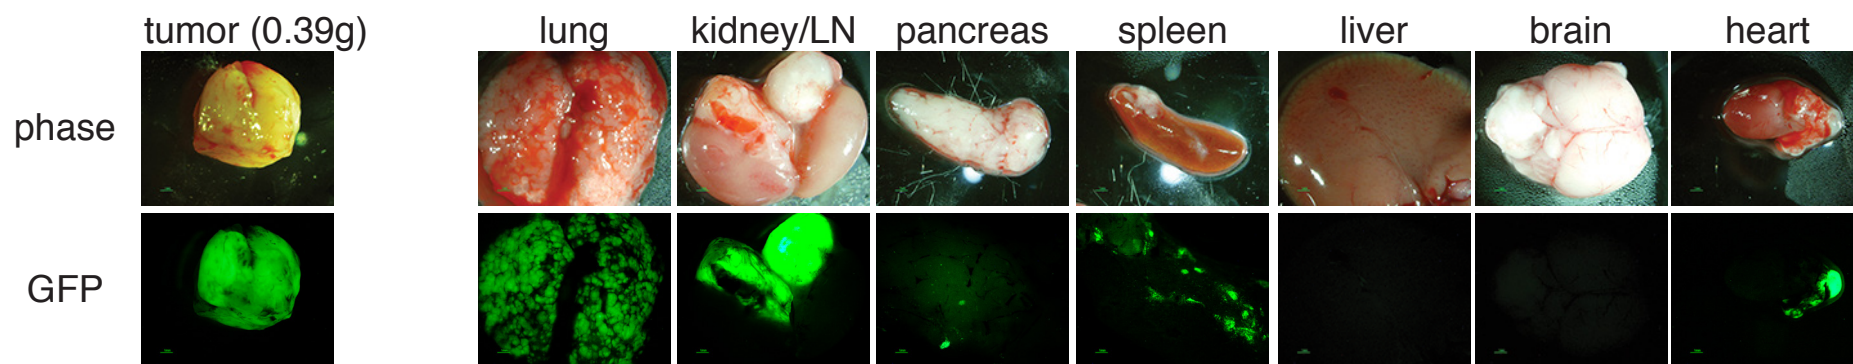

**B** **PC3-Luc/GFP 100k; SC** (animal #3750)

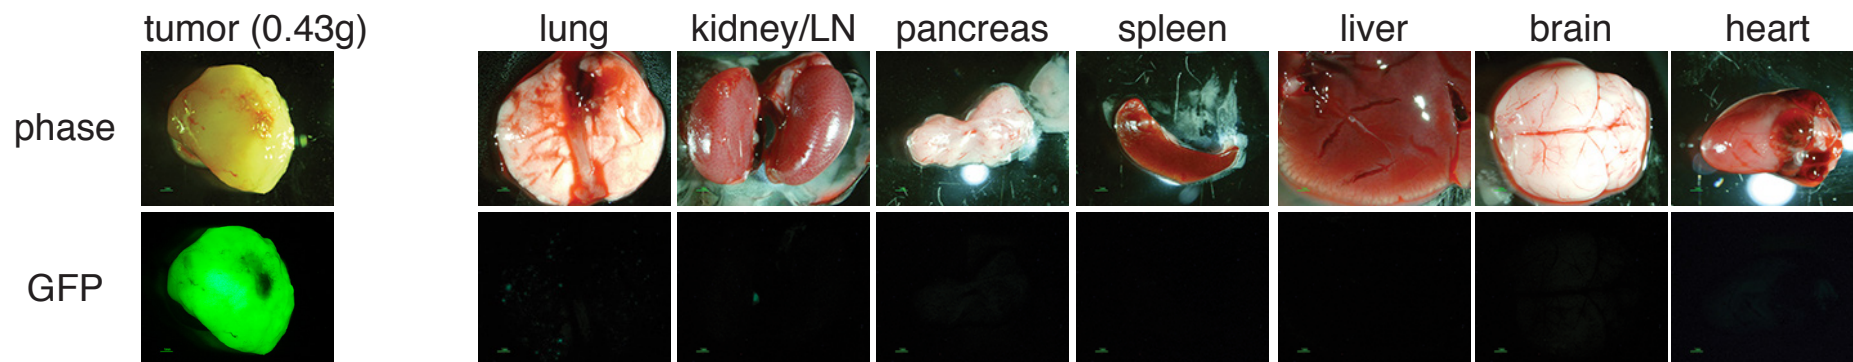

**A**  
**PC3 1x10<sup>6</sup> SC; ~2 wk after plating**  
(animal #0045)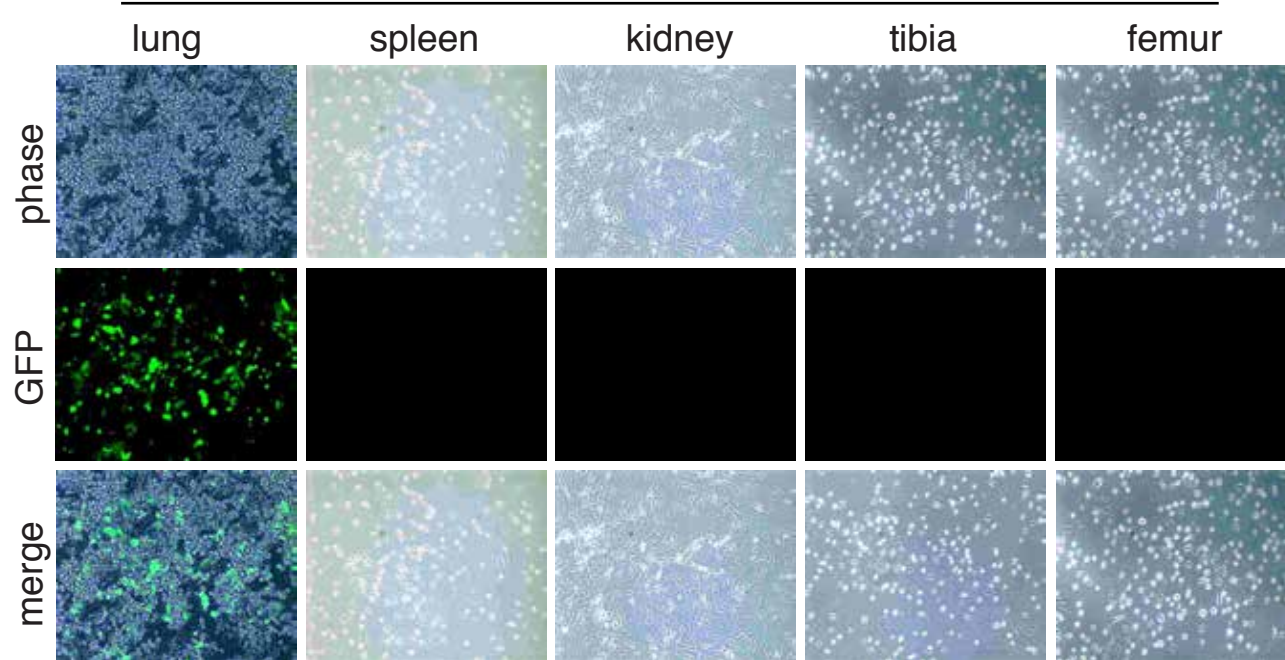**B**  
**PC3 100k AP; 2 d after plating**  
(animal #0020)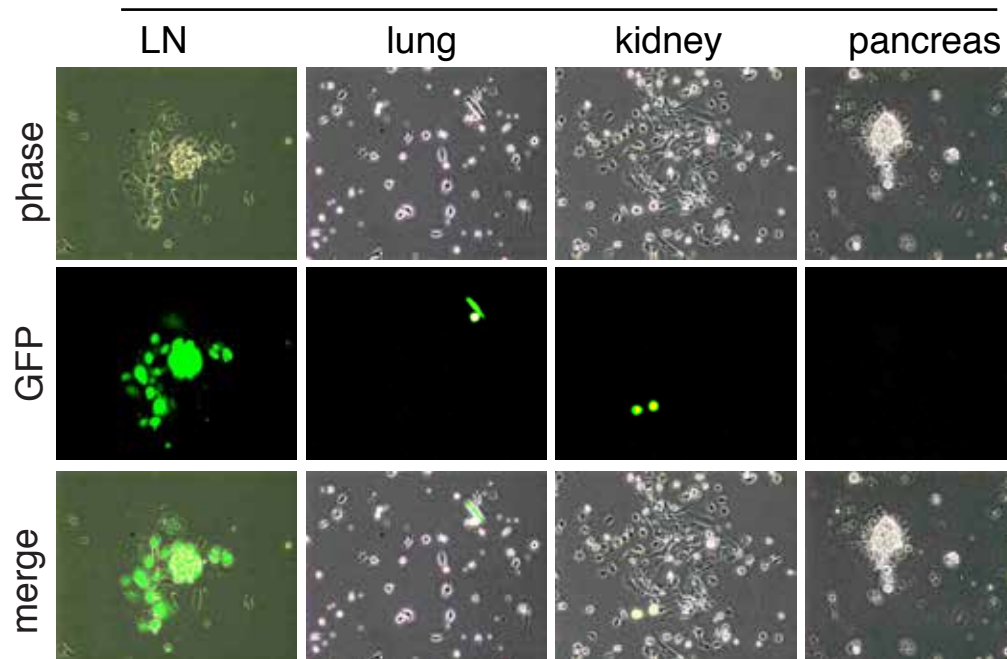**PC3 100k AP; 10 d after plating**  
(animal #0020)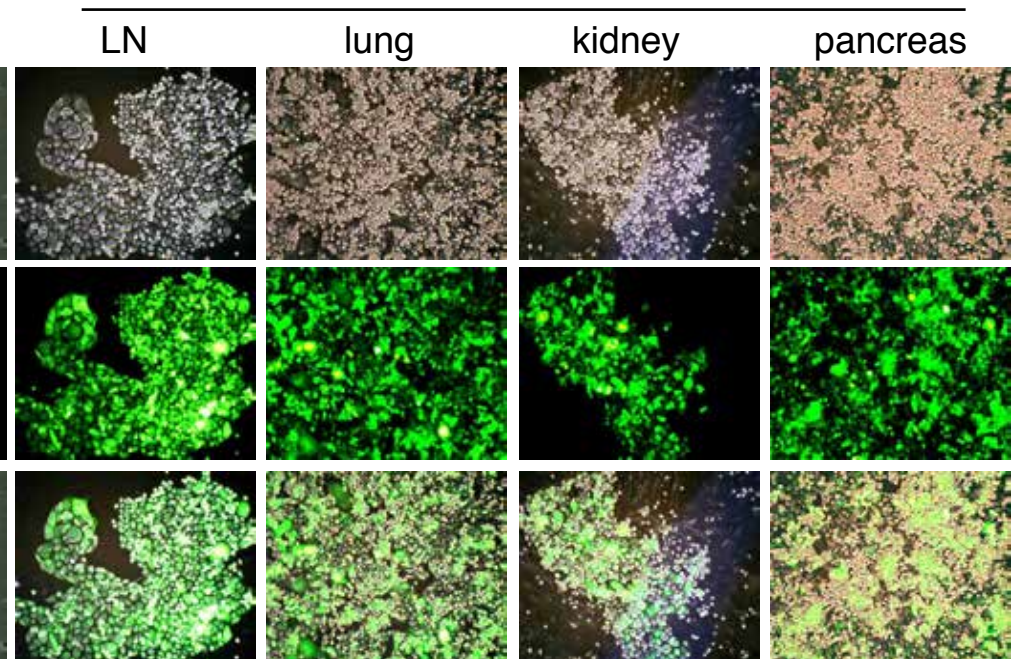

## Supplementary Table S1. AP-implanted PC3-GFP cells metastasize to multiple organs

| Cell number <sup>a</sup> | Termination <sup>b</sup><br>(inj. & term. dates) | Metastasis <sup>c</sup> |       |      |        |       |          |       |        |                      |
|--------------------------|--------------------------------------------------|-------------------------|-------|------|--------|-------|----------|-------|--------|----------------------|
|                          |                                                  | Femur                   | Tibia | Lung | Kidney | Liver | Pancreas | Brain | Spleen | LN <sup>d</sup>      |
| <b>1,000 cells</b>       | <b>0/3</b> (Inj. 09/08/05)                       |                         |       |      |        |       |          |       |        |                      |
| 0012                     | term: 02/04/06                                   | -                       | -     | -    | -      | -     | -        | -     | -      | -                    |
| 0013, 0014               | term: 03/22/06                                   | -                       | -     | -    | -      | -     | -        | -     | -      | -                    |
| <b>10,000 cells</b>      | <b>3/3</b> (Inj. 09/08/05)                       |                         |       |      |        |       |          |       |        |                      |
| 0015                     | term: 01/06/06                                   | -                       | -     | -    | ±      | ±     | ±        | -     | +      | -                    |
| 0016                     | term: 01/04/06                                   | -                       | -     | ++   | ±      | ±     | +        | -     | ±      | ++ <sup>2</sup>      |
| 0017                     | term: 01/02/06                                   | -                       | -     | -    | +      | -     | +        | -     | ±      | ++ <sup>2</sup>      |
| <b>100,000 cells</b>     | <b>3/3</b> (Inj. 09/08/05)                       |                         |       |      |        |       |          |       |        |                      |
| 0018                     | term: 12/20/05                                   | -                       | -     | +    | ±      | -     | ++       | -     | ++     | ++ <sup>2</sup>      |
| 0019                     | term: 12/28/05                                   | -                       | -     | +    | +      | ±     | +        | -     | -      | ++ <sup>2</sup>      |
| 0020                     | term: 12/21/05                                   | N.D                     | N.D   | +    | +      | +     | +        | -     | +      | ++ <sup>2</sup>      |
| <b>1,000,000 cells</b>   | <b>3/3</b> (Inj. 09/08/05)                       |                         |       |      |        |       |          |       |        |                      |
| 0021                     | term: 12/01/05                                   | +                       | +     | +++  | +++    | ++    | +++      | +     | ++     | +++ <sup>4</sup>     |
| 0022                     | term: 12/08/05                                   | N.D                     | N.D   | ++   | ++     | ++    | +++      | +     | ++     | ++ <sup>2</sup>      |
| 0023                     | term: 12/08/05                                   | N.D                     | N.D   | ++   | ++     | ++    | +++      | +     | ++     | N.D                  |
| 0805                     | (inj: 01/26/06) term: 03/28/06                   | ±                       | ±     | +++  | +++    | +++   | +++      | ±     | ++     | +++ <sup>1,3,4</sup> |
| 0807                     | (inj: 01/26/06) term: 03/26/06                   | ±                       | ±     | +++  | +++    | +++   | +++      | +     | ++     | +++ <sup>1,3,4</sup> |

<sup>a</sup>For AP implantation, cells were first recombined with collagen and then implanted into the AP tubules. Numbers (e.g., 0012) beneath refer to animal tags.

<sup>b</sup>Animals were terminated (term.) when they became moribund or tumor burden became overwhelming. The injection (Inj.) dates were indicated. Ratios indicate the number of animals bearing tumors / the total number of animals injected. Note that 1,000 PC3-GFP cells implanted at the AP did not develop any tumors when harvested ~5 months after implantation.

<sup>c</sup>Various end organs harvested when animals were terminated were subjected to tissue disaggregation to make single-cell suspensions. The levels of metastasis were semi-quantified by two individuals under a fluorescence microscope to enumerate the numbers of GFP<sup>+</sup> cells. -, no GFP<sup>+</sup> cells; ±, 1-10 GFP<sup>+</sup> cells; +, dozens of GFP<sup>+</sup> cells; ++, hundreds of GFP<sup>+</sup> cells; +++, thousands or tens of thousands of GFP<sup>+</sup> cells. N.D, not determined.

<sup>d</sup>GFP<sup>+</sup> lymph nodes examined. 1, renal, caudal, and sciatic LN; 2, renal LN; 3, mesenteric and inguinal LN; 4, pyloric LN.

**Table S2. Time course of DP-injected PC3-GFP cell metastasis**

| Time <sup>a</sup><br>(after injection)     | Termination time <sup>b</sup><br>(Inj. & term. dates) | Metastasis <sup>c</sup> |       |      |        |       |          |       |        |                 |
|--------------------------------------------|-------------------------------------------------------|-------------------------|-------|------|--------|-------|----------|-------|--------|-----------------|
|                                            |                                                       | Femur                   | Tibia | Lung | Kidney | Liver | Pancreas | Brain | Spleen | LN <sup>d</sup> |
| <b>PC3-GFP 1,500,000 (DP) Inj:05/19/06</b> |                                                       |                         |       |      |        |       |          |       |        |                 |
| <b>1 week</b>                              |                                                       |                         |       |      |        |       |          |       |        |                 |
| 0686                                       | term:05/26/06                                         | -                       | -     | -    | -      | -     | -        | -     | -      | -               |
| 0679                                       | term:05/26/06                                         | -                       | -     | -    | -      | -     | -        | -     | -      | -               |
| 0678                                       | term:05/26/06                                         | -                       | -     | -    | -      | -     | -        | -     | -      | -               |
| <b>2 weeks</b>                             |                                                       |                         |       |      |        |       |          |       |        |                 |
| 0682                                       | term:06/02/06                                         | -                       | -     | ±    | -      | -     | ±        | -     | -      | -               |
| 0683                                       | term:06/02/06                                         | -                       | -     | ±    | -      | -     | ±        | -     | -      | -               |
| 0684                                       | term:06/02/06                                         | -                       | -     | ±    | -      | -     | ±        | -     | -      | -               |
| 0685                                       | term:06/02/06                                         | -                       | -     | -    | -      | -     | ±        | -     | -      | -               |
| <b>3 weeks</b>                             |                                                       |                         |       |      |        |       |          |       |        |                 |
| 0024                                       | term:06/09/06                                         | -                       | -     | ±    | +      | +     | ++       | -     | ++     | +               |
| 0025                                       | term:06/09/06                                         | -                       | -     | ±    | -      | -     | -        | -     | -      | -               |
| 0026                                       | term:06/09/06                                         | -                       | -     | +    | -      | +     | ±        | -     | -      | +               |
| 0027                                       | term:06/09/06                                         | -                       | -     | ±    | -      | -     | -        | -     | -      | -               |
| <b>4 weeks</b>                             |                                                       |                         |       |      |        |       |          |       |        |                 |
| 0028                                       | term:06/16/06                                         | -                       | -     | +    | -      | -     | +        | -     | -      | ++              |
| 0029                                       | term:06/16/06                                         | -                       | -     | +    | +      | +     | ++       | -     | +      | ++              |
| 0030                                       | term:06/16/06                                         | -                       | -     | +    | +      | +     | +        | -     | +      | +               |
| 0031                                       | term:06/16/06                                         | -                       | -     | +    | +      | -     | +        | -     | +      | -               |
| <b>5 weeks</b>                             |                                                       |                         |       |      |        |       |          |       |        |                 |
| 0032                                       | term:06/23/06                                         | -                       | -     | ++   | ++     | ±     | ++       | -     | +      | +++             |
| 0033                                       | term:06/23/06                                         | -                       | -     | ++   | ++     | ±     | ++       | -     | +      | ++              |
| <b>6 weeks</b>                             |                                                       |                         |       |      |        |       |          |       |        |                 |
| 0034                                       | term:06/30/06                                         | -                       | -     | +++  | +++    | +     | ++       | -     | +      | +++             |
| 0035                                       | term:06/30/06                                         | -                       | -     | ++   | ++     | ±     | +        | -     | +      | ++              |
| 0036                                       | term:06/30/06                                         | -                       | -     | ++   | ++     | +     | ++       | -     | +      | ++              |
| 0037                                       | term:06/30/06                                         | -                       | -     | ++   | ++     | ±     | ++       | -     | +      | ++              |
| 0038                                       | term:06/30/06                                         | -                       | -     | +++  | +++    | +     | ++       | -     | +      | +++             |
| <b>7 weeks</b>                             |                                                       |                         |       |      |        |       |          |       |        |                 |
| 0039                                       | term:07/07/06                                         | ±                       | -     | +++  | +++    | +     | ++       | ±     | +      | +++             |
| 0040                                       | term:07/07/06                                         | ±                       | -     | +++  | +++    | +     | ++       | ±     | +      | +++             |
| 0041                                       | term:07/07/06                                         | -                       | -     | +++  | +++    | +     | ++       | +     | +      | +++             |
| 0042                                       | term:07/07/06                                         | -                       | -     | +++  | ++     | +     | ++       | -     | ++     | ++              |
| 0043                                       | term:07/07/06                                         | -                       | -     | +++  | ++     | ±     | +        | -     | +      | ++              |

<sup>a-d</sup>PC3 cell metastasis to the lung and pancreas was observed first in the second week after DP implantations, after which time increasing metastasis to many other organs was noted. By 7 weeks, the lung, LN, and kidney showed highest levels of metastasis. Numbers (e.g., 0686) represent animal tags.
